# Supplementary material for: Neural mechanisms of parasite-induced summiting behavior in ‘zombie’ Drosophila
Source: eLife. 2023 May 15;12:e85410. doi: 10.7554/eLife.85410 (PMC10259475; doi:10.7554/eLife.85410)
Supplement: Figure 6—figure supplement 2—source data 1. [file elife-85410-fig6-figsupp2-data1.xlsx]

## Sheet: Fig6A_20220720
log2(S/NS)	Tentative formula	MW	Tentative ID	Category	pvalue
6.38082	C16 H23 N5 O9	429.15			0.0281296
4.64386	C6 H8 N2 O3	156.054		Summiting only	0.2227
4.64386	C14 H16 N6 O7	380.108		Summiting only	0.00275
4.44222	C10 H13 N5 O5	283.091	Guanosine		0.0178504
4.4112	C9 H12 N2 O6	244.069	Uridine		0.00283234
3.81604	C15 H14 Cl F N2	276.082			0.00379418
3.68038	C10 H17 N3 O2	211.132			0.000156545
3.18442	C12 H19 N2 P S	254.1		Summiting only	0.00182
2.87832	C3 H9 N7 O11	319.036			0.0139282
2.8365	C4 H5 N3 O	111.043	Cytosine	Exposed only	0.00115
2.71786	C5 H4 N4 O	136.039	Hypoxanthine		0.000271753
2.7084	C10 H12 N4 O5	268.081	Inosine		0.0271277
2.50635	C7 H7 N5 O2	193.06			0.00414391
2.12658	C7 H9 N5 O	179.081			0.0119405
2.08314	C5 H7 N3 O	125.059	5-Methylcytosine		0.0276919
2		158.02			0.00709784
1.75147	C5 H5 N5	135.055	Adenine		0.0155075
1.53533	C9 H11 N5 O3	237.086	Biopterin		0.0379163
1.51457	C5 H6 N2	94.0531		Exposed only	0.05655
1.37707	C6 H15 N O	117.115			0.0409806
1.0862	C4 H6 O4	118.027			0.0235575
1.02034	C11 H20 N2 O3	228.147	Prolylleucine		0.0358789
0.888969	C9 H15 N3 O2 S	229.089	Ergothioneine	Exposed only	0.48123
0.535332	C8 H15 N3	153.127		Exposed only	0.33395
-1.30042	C5 H9 N O2	115.063	Proline		0.0151122
-1.32193	C9 H15 N3 O2	197.116		Exposed only	0.8791
-1.32998	C4 H7 N	69.0578			0.0227362
-1.32998	C25 H49 N O4	427.366			0.00478721
-1.83996	C24 H46 N O2 P S2	475.27			0.0410635
-1.98222	C5 H11 N O3 S	165.046	Methionine sulfoxide		0.00187712
-1.98914	C11 H18 N2 O3	226.132			0.00588354
-2.09288	C11 H23 N O9 S	345.109			2.63023e-06
-2.1273	C5 H8 O2 S	132.025			0.0215253
-2.4098	C3 H5 N7 O S	187.028			0.00268073
-2.54918	C24 H35 N7 O2	453.285			0.0132246
-3.05866	C6 H10 N2 O2	142.074			0.00504281
-3.16993	C11 H9 N O2	187.063	trans-3-Indoleacrylic acid		0.0202433
-3.43376	C27 H41 N7 O2	495.333			0.00443153
-3.5793	C21 H42 N O7 P	451.27			0.000561063
-3.58412	C10 H13 N O2	179.095			0.000861317
-3.6397	C17 H45 N9 O9	519.334			0.00621108
-3.72421	C24 H48 N O7 P	493.317			0.00196016
-3.77726	C21 H47 N9 O4 S	521.348			0.00474885
-3.92477	C10 H13 N O3	195.09	N-Acetyldopamine		0.000195886
-4.13988	C8 H8 O2	136.052			0.000369634
-4.57972	C16 H23 N O8	357.142			0.00157793
-5.59012	C7 H13 N O5 S	223.051			0.0145071
